# Supplementary material
Source: publisher site journal article supplement (https://www.dovepress.com/article/318052)
Supplement: Supplementary file 1 [file get_supplementary_file.php]

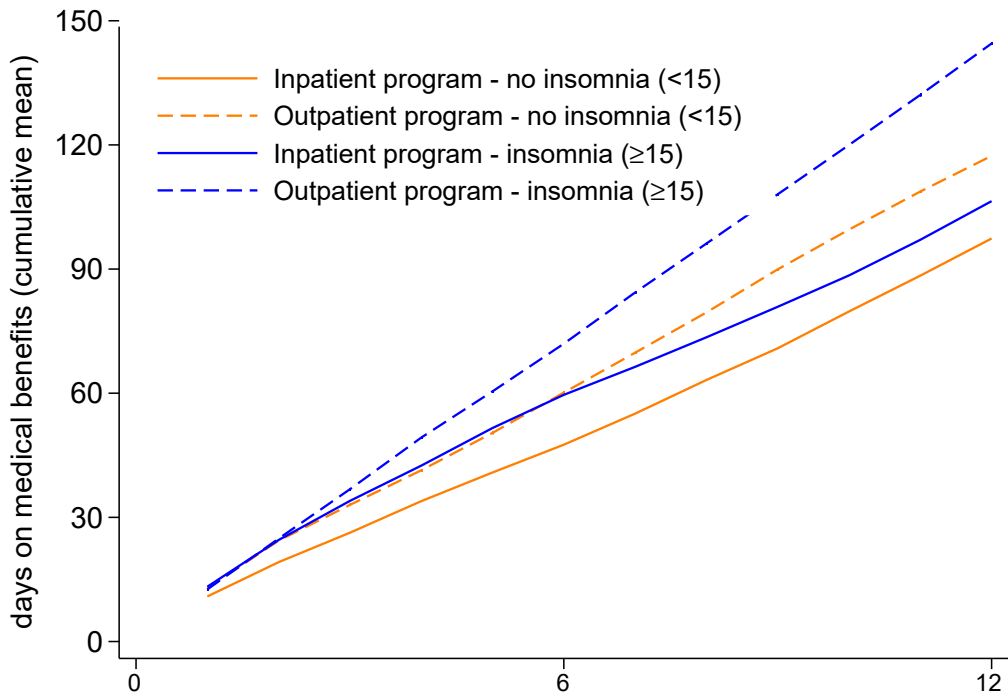

**Figure S1.** Sick leave days (cumulative mean) during 12 months of follow-up for participants in each stratum of occupational program and insomnia.

Table S1: Associations of occupational program and insomnia with accumulated sickness absence during 12 months follow-up. Insomnia measured by Insomnia Severity Index (ISI).

|                          | Days with sickness absence |                   |                                                    |                                                 |
|--------------------------|----------------------------|-------------------|----------------------------------------------------|-------------------------------------------------|
|                          | No. of persons             | Age adjusted mean | Age-adjusted mean difference <sup>a</sup> (95% CI) | Adjusted mean Difference <sup>ab</sup> (95% CI) |
| No insomnia <sup>c</sup> |                            |                   |                                                    |                                                 |
| Inpatient program        | 55                         | 97                | Reference                                          | Reference                                       |
| Outpatient program       | 44                         | 117               | 20 (-14 to 54)                                     | 21 (-14 to 55)                                  |
| Insomnia <sup>d</sup>    |                            |                   |                                                    |                                                 |
| Inpatient program        | 31                         | 106               | 9 (-29 to 47)                                      | 7 (-31 to 45)                                   |
| Outpatient program       | 33                         | 145               | 47 (10 to 84)                                      | 50 (13 to 88)                                   |

CI, confidence interval; ISI, Insomnia Severity Index

<sup>a</sup> Mean difference: difference in number of sick leave days relative to the reference group.

<sup>b</sup> Adjusted for age, sex and education

<sup>c</sup> ISI-score <15

<sup>d</sup> ISI-score ≥15

Table S2: Associations of occupational program and insomnia with the probability of achieving sustainable of return to work during 12 months follow-up. Insomnia measured by Insomnia Severity Index (ISI).

|                                | Probability of sustainable return to work |                          |                                   |
|--------------------------------|-------------------------------------------|--------------------------|-----------------------------------|
|                                | n                                         | Age adjusted<br>(95% CI) | Adjusted <sup>a</sup><br>(95% CI) |
| <i>ISI score cut-off at 11</i> |                                           |                          |                                   |
| No insomnia <sup>b</sup>       |                                           |                          |                                   |
| Inpatient program              | 38                                        | 0.53 (0.37 to 0.69)      | 0.53 (0.37 to 0.68)               |
| Outpatient program             | 34                                        | 0.51 (0.34 to 0.68)      | 0.52 (0.38 to 0.68)               |
| Insomnia <sup>c</sup>          |                                           |                          |                                   |
| Inpatient program              | 48                                        | 0.63 (0.49 to 0.76)      | 0.64 (0.50 to 0.77)               |
| Outpatient program             | 43                                        | 0.29 (0.15 to 0.42)      | 0.27 (0.14 to 0.41)               |
| <i>ISI score cut-off at 15</i> |                                           |                          |                                   |
| No insomnia <sup>d</sup>       |                                           |                          |                                   |
| Inpatient program              | 55                                        | 0.58 (0.46 to 0.71)      | 0.59 (0.46 to 0.71)               |
| Outpatient program             | 44                                        | 0.44 (0.30 to 0.59)      | 0.44 (0.30 to 0.59)               |
| Insomnia <sup>e</sup>          |                                           |                          |                                   |
| Inpatient program              | 31                                        | 0.59 (0.42 to 0.76)      | 0.59 (0.42 to 0.77)               |
| Outpatient program             | 33                                        | 0.31 (0.15 to 0.46)      | 0.30 (0.14 to 0.46)               |

CI, confidence interval; ISI, Insomnia Severity Index

<sup>a</sup> Adjusted for age, sex and education

<sup>b</sup> ISI-score <11

<sup>c</sup> ISI-score ≥11

<sup>d</sup> ISI-score <15

<sup>e</sup> ISI-score ≥15

Table S3: Associations of occupational program and insomnia with accumulated sickness absence during 12 months follow-up adjusted for depression. Insomnia measured by Insomnia Severity Index (ISI).

|                          | Days with sickness absence |                   |                                                    |                                                 |
|--------------------------|----------------------------|-------------------|----------------------------------------------------|-------------------------------------------------|
|                          | No. of persons             | Age adjusted mean | Age-adjusted mean difference <sup>a</sup> (95% CI) | Adjusted mean Difference <sup>ab</sup> (95% CI) |
| No insomnia <sup>c</sup> |                            |                   |                                                    |                                                 |
| Inpatient program        | 38                         | 105               | Reference                                          | Reference                                       |
| Outpatient program       | 34                         | 105               | 0 (-40 to 39)                                      | -3 (-43 to 37)                                  |
| Insomnia <sup>d</sup>    |                            |                   |                                                    |                                                 |
| Inpatient program        | 48                         | 97                | -8 (-44 to 28)                                     | 13 (-50 to 25)                                  |
| Outpatient program       | 43                         | 148               | 43 (5 to 80)                                       | 43 (4 to 82)                                    |

CI, confidence interval; ISI, Insomnia Severity Index

<sup>a</sup> Mean difference: difference in number of sick leave days relative to the reference group.

<sup>b</sup> Adjusted for age, sex, education, and depression (measured by the The Hospital Anxiety and Depression Scale)

<sup>c</sup> ISI-score <11

<sup>d</sup> ISI-score ≥11
